# Supplementary material for: Diabetes, Its Treatment, and Catastrophic Medical Spending in 35 Developing Countries
Source: PubMed Central journal article supplement — Diabetes Care. 2012 Jan 16;35(2):319–26. doi: 10.2337/dc11-1770 (PMC3263916; doi:10.2337/dc11-1770), 2012-01-16
Supplement: supp_dc11-1770v111770_DC111770SupplementaryData.pdf [file supp_dc11-1770v111770_DC111770SupplementaryData.pdf]

SUPPLEMENTARY DATA

**Supplementary Table 1.** List of 35 Included and 10 Excluded Countries

| <b>Countries Included in Main Analysis</b> |                   |                    |             | <b>Countries Excluded from Analysis</b> |
|--------------------------------------------|-------------------|--------------------|-------------|-----------------------------------------|
| <i>Middle-income</i>                       | <i>Low-income</i> |                    |             |                                         |
| Kazakhstan                                 | Ghana             | China              | Paraguay    | Bosnia<br>Herzegovina                   |
| Malaysia                                   | India             | Congo*             | Philippines | Brazil                                  |
| Mexico                                     | Kenya             | Cote d'Ivoire*     | Senegal     | Comoros                                 |
| Russia                                     | Laos              | Dominican Republic | Sri Lanka   | Guatemala                               |
| South Africa                               | Malawi            | Ecuador            | Swaziland*  | Latvia                                  |
| Uruguay                                    | Mali*             | Ethiopia*          | Tunisia     | Mauritius                               |
|                                            | Mauritania        | Georgia            | Ukraine     | Morocco                                 |
|                                            | Bangladesh        | Myanmar            | Vietnam     | Nepal                                   |
|                                            | Burkina Faso*     | Namibia            | Zambia*     | Turkey                                  |
|                                            | Chad*             | Pakistan           |             | Zimbabwe                                |

\*No individuals with diabetes in these countries possessed diabetes medications. Hence these 10 countries were dropped from the logistic regression of medical possession and health insurance.

To create the low- and middle-income per-capita GDP groups, countries were ordered in ascending per-capita GDP and added to the low-income group until the number of persons with diabetes in each group were approximately equal (low-income group 1,695 diabetic individuals; middle-income group 1,643 diabetic individuals).

SUPPLEMENTARY DATA

**Supplementary Table 2.** Characteristics of Persons With and Without Diabetes Included in the Analysis

| Variable                                                  | Persons with Diabetes |           | Persons without Diabetes |           |
|-----------------------------------------------------------|-----------------------|-----------|--------------------------|-----------|
|                                                           | Percent               | SE        | Percent                  | SE        |
| Health insurance                                          | 28.8%                 | 9.6%      | 16.6%                    | 5.9%      |
| Catastrophic medical spending*                            | 16.2%                 | 3.7%      | 13.9%                    | 2.5%      |
| Male                                                      | 42.3%                 | 4.5%      | 48.6%                    | 1.5%      |
| Urban                                                     | 52.4%                 | 10.8%     | 34.4%                    | 7.7%      |
| Current daily smoker                                      | 19.5%                 | 6.0%      | 20.8%                    | 3.4%      |
| age 20-29                                                 | 6.3%                  | 1.3%      | 27.7%                    | 1.0%      |
| age 30-39                                                 | 8.7%                  | 1.0%      | 22.7%                    | 0.4%      |
| age 40-49                                                 | 20.5%                 | 3.6%      | 18.2%                    | 0.8%      |
| age 50-59                                                 | 22.4%                 | 1.8%      | 11.9%                    | 0.3%      |
| age 60 +                                                  | 40.2%                 | 2.9%      | 13.1%                    | 0.7%      |
| School < 1 yr                                             | 19.0%                 | 6.0%      | 23.6%                    | 6.1%      |
| School 1-7 years                                          | 35.9%                 | 4.2%      | 31.5%                    | 3.9%      |
| School 8-12 years                                         | 32.2%                 | 8.7%      | 34.4%                    | 6.0%      |
| School 13+ years                                          | 12.9%                 | 5.7%      | 10.5%                    | 2.3%      |
|                                                           | <b>Mean</b>           | <b>SE</b> | <b>Mean</b>              | <b>SE</b> |
| Total spending previous 4 weeks, per capita (2005 I\$)    | \$133.9               | \$23.7    | \$83.3                   | \$15.2    |
| Medical spending, previous 4 weeks, per capita (2005 I\$) | \$12.8                | \$2.0     | \$7.0                    | \$0.7     |
| Age (years)                                               | 53.4                  | 1.1       | 38.9                     | 0.5       |

\*Catastrophic spending exists when medical expenses exceed 40% of household's capacity to pay (18).  
SE= Robust Standard Error

SUPPLEMENTARY DATA

**Supplementary Table 3.** Other Characteristics of WHS Respondents from 35 countries: Alternate Definitions of Catastrophic Medical Spending and Indicators of Permanent Income.

|                                                      | Included in Main Analysis (N= 121,051 ) |      | All Responding to Given Question |         |      |
|------------------------------------------------------|-----------------------------------------|------|----------------------------------|---------|------|
|                                                      | Percent                                 | SE   | N                                | Percent | SE   |
| Medical expenses exceed X% of total household income |                                         |      |                                  |         |      |
| >10%                                                 | 28.3%                                   | 4.5% | 181,700                          | 32.0%   | 4.0% |
| >15%                                                 | 19.6%                                   | 3.3% | 181,700                          | 22.6%   | 3.0% |
| >20%                                                 | 14.3%                                   | 2.4% | 181,700                          | 17.1%   | 2.4% |
| >25%                                                 | 11.0%                                   | 2.0% | 181,700                          | 13.8%   | 2.1% |
| >30%                                                 | 7.9%                                    | 1.4% | 181,700                          | 10.7%   | 2.0% |
| >35%                                                 | 5.9%                                    | 1.0% | 181,700                          | 8.7%    | 1.9% |
| >40%                                                 | 4.9%                                    | 0.9% | 181,700                          | 7.7%    | 2.0% |
| Indicators of permanent income                       | Percent                                 | SE   | N                                | Percent | SE   |
| 1 room                                               | 12.9%                                   | 1.8% | 200,828                          | 12.9%   | 1.9% |
| 2-3 rooms                                            | 47.1%                                   | 2.3% | 200,828                          | 45.5%   | 2.0% |
| 4-5 rooms                                            | 26.8%                                   | 1.9% | 200,828                          | 28.1%   | 2.3% |
| > 5 rooms                                            | 13.2%                                   | 1.4% | 200,828                          | 13.2%   | 1.1% |
| 0 chairs                                             | 26.3%                                   | 7.3% | 199,823                          | 32.1%   | 7.0% |
| 1 chair                                              | 8.7%                                    | 1.8% | 199,823                          | 9.5%    | 2.1% |
| 2-3 chairs                                           | 17.7%                                   | 2.4% | 199,823                          | 16.4%   | 2.3% |
| > 3 chairs                                           | 47.4%                                   | 8.8% | 199,823                          | 42.0%   | 8.7% |
| 0 tables                                             | 25.8%                                   | 9.3% | 199,659                          | 28.0%   | 9.3% |
| 1 table                                              | 37.0%                                   | 4.8% | 199,659                          | 37.6%   | 5.0% |
| 2-3 tables                                           | 30.6%                                   | 5.2% | 199,659                          | 28.2%   | 5.0% |
| > 3 tables                                           | 6.7%                                    | 1.3% | 199,659                          | 6.2%    | 1.3% |
| 0 cars                                               | 84.2%                                   | 5.3% | 179,314                          | 85.1%   | 5.2% |
| 1 car                                                | 14.3%                                   | 5.2% | 179,314                          | 13.3%   | 4.9% |
| 2 cars                                               | 1.1%                                    | 0.4% | 179,314                          | 1.3%    | 0.5% |
| > 2 cars                                             | 0.3%                                    | 0.1% | 179,314                          | 0.4%    | 0.2% |
| Electricity                                          | 66.3%                                   | 5.1% | 199,778                          | 65.0%   | 5.0% |
| Bicycle                                              | 51.5%                                   | 5.9% | 200,924                          | 51.3%   | 6.5% |
| Clock                                                | 70.6%                                   | 5.9% | 200,985                          | 67.4%   | 7.7% |
| Bucket                                               | 80.0%                                   | 6.2% | 200,978                          | 77.2%   | 8.4% |
| Washing machine                                      | 21.9%                                   | 7.3% | 200,790                          | 23.9%   | 9.0% |
| Dishwasher                                           | 1.3%                                    | 0.4% | 200,653                          | 1.4%    | 0.4% |
| Refrigerator                                         | 29.2%                                   | 7.9% | 200,833                          | 30.1%   | 9.0% |
| Telephone line                                       | 22.1%                                   | 5.1% | 200,731                          | 25.8%   | 7.7% |
| Mobile phone                                         | 14.6%                                   | 4.2% | 200,604                          | 15.3%   | 5.1% |
| Television                                           | 49.0%                                   | 6.2% | 200,870                          | 45.8%   | 5.9% |
| Computer                                             | 6.0%                                    | 1.5% | 200,277                          | 6.3%    | 1.7% |

SUPPLEMENTARY DATA

**Supplementary Table 4.** Predicted Difference in Probability of Catastrophic Spending Using Different Definitions.

The predicted difference in probability of catastrophic spending is the difference, for example, between the probability of catastrophic medical spending if all persons in the sample had diabetes minus the probability of the outcome if all persons in the sample did not have diabetes.

The same pattern of significance seen with all definitions (except 20%) was observed when catastrophic spending was defined as >35% and >40% of total spending (results Not shown).

| Groups compared                                                              | Predicted Difference in Probability of Catastrophic Spending | 95 % CI |       | Difference p<0.05 |
|------------------------------------------------------------------------------|--------------------------------------------------------------|---------|-------|-------------------|
| <b>Catastrophic Spending defined as ≥ 40% Capacity to Pay</b>                |                                                              |         |       |                   |
| Diabetics vs. Non-diabetics                                                  | 3.9%                                                         | 0.2%    | 7.7%  | Yes               |
| Insured vs. Uninsured                                                        | 0.7%                                                         | -0.6%   | 2.0%  | No                |
| Among Non-Diabetics, Insured vs. Uninsured                                   | 0.7%                                                         | -0.6%   | 1.9%  | No                |
| Among Diabetics, Insured vs. Uninsured                                       | 0.8%                                                         | -7.3%   | 8.8%  | No                |
| <b>Catastrophic Spending defined as ≥ 10% total spending on medical care</b> |                                                              |         |       |                   |
| Diabetics vs. Non-diabetics                                                  | 5.2%                                                         | 1.1%    | 9.3%  | Yes               |
| Insured vs. Uninsured                                                        | 0.8%                                                         | -1.9%   | 3.6%  | No                |
| Among Non-Diabetics, Insured vs. Uninsured                                   | 0.8%                                                         | -1.9%   | 3.5%  | No                |
| Among Diabetics, Insured vs. Uninsured                                       | 1.3%                                                         | -8.0%   | 10.5% | No                |
| <b>Catastrophic Spending defined as ≥ 15% total spending on medical care</b> |                                                              |         |       |                   |
| Diabetics vs. Non-diabetics                                                  | 3.8%                                                         | 0.5%    | 7.0%  | Yes               |
| Insured vs. Uninsured                                                        | 0.8%                                                         | -2.1%   | 3.6%  | No                |
| Among Non-Diabetics, Insured vs. Uninsured                                   | 0.8%                                                         | -1.9%   | 3.6%  | No                |
| Among Diabetics, Insured vs. Uninsured                                       | -0.3%                                                        | -11.2%  | 10.5% | No                |
| <b>Catastrophic Spending defined as ≥ 20% total spending on medical care</b> |                                                              |         |       |                   |
| Diabetics vs. Non-diabetics                                                  | 2.7%                                                         | -0.2%   | 5.6%  | No                |
| Insured vs. Uninsured                                                        | -0.6%                                                        | -3.5%   | 2.3%  | No                |
| Among Non-Diabetics, Insured vs. Uninsured                                   | -0.6%                                                        | -3.5%   | 2.3%  | No                |
| Among Diabetics, Insured vs. Uninsured                                       | -0.4%                                                        | -10.0%  | 9.3%  | No                |
| <b>Catastrophic Spending defined as ≥ 25% total spending on medical care</b> |                                                              |         |       |                   |
| Diabetics vs. on-diabetics                                                   | 3.4%                                                         | 1.6%    | 5.2%  | Yes               |
| Insured vs. Uninsured                                                        | -0.3%                                                        | -2.7%   | 2.0%  | No                |
| Among Non-Diabetics, Insured vs. Uninsured                                   | -0.4%                                                        | -2.7%   | 2.0%  | No                |
| Among Diabetics, Insured vs. Uninsured                                       | -0.1%                                                        | -7.8%   | 7.5%  | No                |

SUPPLEMENTARY DATA

| <b>Catastrophic Spending defined as <math>\geq</math> 30% total spending on medical care</b> |       |       |      |     |
|----------------------------------------------------------------------------------------------|-------|-------|------|-----|
| Diabetics vs. Non-diabetics                                                                  | 2.0%  | 0.5%  | 3.6% | Yes |
| Insured vs. Uninsured                                                                        | 0.1%  | -1.2% | 1.4% | No  |
| Among Non-Diabetics, Insured vs. Uninsured                                                   | 0.2%  | -1.1% | 1.4% | No  |
| Among Diabetics, Insured vs. Uninsured                                                       | -0.8% | -7.1% | 5.5% | No  |

**Supplementary Table 5.** Predicted Prevalence of Catastrophic Spending and Medication Possession, Stratified by per-capita GDP and Geographic Region.

|                                                                            | <b>Without diabetes</b>  | <b>With Diabetes</b>  | <b>Difference (p-value)</b> | <b>Without Insurance</b> | <b>With Insurance</b> | <b>Difference (p-value)</b> |
|----------------------------------------------------------------------------|--------------------------|-----------------------|-----------------------------|--------------------------|-----------------------|-----------------------------|
| Low-income per-capita GDP                                                  | 15.4%                    | 21.4%                 | 5.9% (p=0.005)              | 15.5%                    | 16.2%                 | ns (p=0.496)                |
| Middle-income per-capita GDP                                               | 7.6%                     | 6.7%                  | ns (p=0.691)                | 8.1%                     | 7.1%                  | -1% (p=0.025)               |
| Africa Region*                                                             | 8.3%                     | 8.4%                  | ns (p=0.971)                | 8.4%                     | 7.3%                  | ns (p=0.419)                |
| Asia Region                                                                | 16.1%                    | 23.3%                 | 7.2% (p=0.002)              | 16.2%                    | 18.2%                 | ns (p=0.071)                |
| Europe/Latin America Region                                                | 10.9%                    | 11.6%                 | ns (p=0.661)                | 11.7%                    | 10.2%                 | -1.5% (p=0.000)             |
| <b>Predicted Prevalence of Possession of Medications to Treat Diabetes</b> |                          |                       |                             |                          |                       |                             |
|                                                                            | <b>Without Insurance</b> | <b>With Insurance</b> | <b>Difference (p-value)</b> |                          |                       |                             |
| Low-income per-capita GDP                                                  | 22.2%                    | 22.9%                 | ns (p=0.852)                |                          |                       |                             |
| Middle-income per-capita GDP                                               | 16.5%                    | 23.1%                 | 6.6% (p=0.011)              |                          |                       |                             |
| Africa Region*                                                             | --                       | --                    | --                          |                          |                       |                             |
| Asia Region                                                                | 21.0%                    | 17.5%                 | ns (p=0.463)                |                          |                       |                             |

SUPPLEMENTARY DATA

|                                   |       |       |                   |  |  |  |
|-----------------------------------|-------|-------|-------------------|--|--|--|
| Europe/Latin<br>America<br>Region | 18.5% | 27.2% | 9.0%<br>(p=0.000) |  |  |  |
|-----------------------------------|-------|-------|-------------------|--|--|--|

SUPPLEMENTARY DATA

**Supplementary Table 6.** Sensitivity Analysis: Predicted Difference in Catastrophic Spending, Removing One Country at a Time.

| <b>Country Removed</b> | <b>Predicted difference , Diabetes vs. No Diabetes</b> | <b>p value</b> | <b>Predicted difference , Insurance vs. no insurance</b> | <b>p value</b> | <b>Number of observations per country</b> |
|------------------------|--------------------------------------------------------|----------------|----------------------------------------------------------|----------------|-------------------------------------------|
| <i>Full analysis</i>   | 3.9%                                                   | 0.041          | 0.7%                                                     | 0.294          |                                           |
| Burkina Faso           | 3.9%                                                   | 0.042          | 0.7%                                                     | 0.291          | 4,151                                     |
| Bangladesh             | 4.3%                                                   | 0.029          | 0.6%                                                     | 0.343          | 2,404                                     |
| China                  | 3.8%                                                   | 0.048          | 0.7%                                                     | 0.286          | 3,669                                     |
| Cote d'Ivoire          | 3.9%                                                   | 0.045          | 0.8%                                                     | 0.249          | 1,985                                     |
| Congo                  | 3.9%                                                   | 0.041          | 0.7%                                                     | 0.294          | 907                                       |
| Dominican R.           | 3.9%                                                   | 0.049          | 0.7%                                                     | 0.278          | 3,734                                     |
| Ecuador                | 4.1%                                                   | 0.035          | 0.8%                                                     | 0.246          | 1,065                                     |
| Ethiopia               | 3.9%                                                   | 0.05           | 0.7%                                                     | 0.312          | 2,722                                     |
| Georgia                | 3.9%                                                   | 0.042          | 0.7%                                                     | 0.295          | 281                                       |
| Ghana                  | 3.9%                                                   | 0.047          | 0.7%                                                     | 0.278          | 2,855                                     |
| India                  | 2.2%                                                   | 0.117          | 0.6%                                                     | 0.414          | 5,075                                     |
| Kazakhstan             | 3.8%                                                   | 0.048          | 0.7%                                                     | 0.275          | 1,568                                     |
| Kenya                  | 3.9%                                                   | 0.043          | 0.8%                                                     | 0.23           | 3,737                                     |
| Laos                   | 3.9%                                                   | 0.043          | 0.7%                                                     | 0.298          | 4,339                                     |
| Sri Lanka              | 3.8%                                                   | 0.051          | 0.6%                                                     | 0.366          | 3,000                                     |
| Mexico                 | 4.2%                                                   | 0.06           | 0.7%                                                     | 0.468          | 23,320                                    |
| Mali                   | 3.9%                                                   | 0.042          | 0.7%                                                     | 0.262          | 1,301                                     |
| Myanmar                | 3.9%                                                   | 0.049          | 0.7%                                                     | 0.318          | 5,861                                     |
| Mauritania             | 3.9%                                                   | 0.042          | 0.7%                                                     | 0.291          | 1,808                                     |
| Malawi                 | 3.9%                                                   | 0.042          | 0.7%                                                     | 0.3            | 4,703                                     |
| Malaysia               | 4.0%                                                   | 0.039          | 0.7%                                                     | 0.304          | 2,699                                     |
| Namibia                | 3.9%                                                   | 0.041          | 0.7%                                                     | 0.305          | 2,801                                     |
| Pakistan               | 4.3%                                                   | 0.036          | 0.4%                                                     | 0.506          | 3,809                                     |
| Philippines            | 3.2%                                                   | 0.124          | 0.0%                                                     | 0.998          | 9,110                                     |
| Paraguay               | 4.0%                                                   | 0.041          | 0.7%                                                     | 0.303          | 4,898                                     |
| Russia                 | 4.4%                                                   | 0.024          | 0.8%                                                     | 0.237          | 1,094                                     |
| Senegal                | 3.9%                                                   | 0.041          | 0.7%                                                     | 0.292          | 1,172                                     |
| Swaziland              | 3.9%                                                   | 0.041          | 0.7%                                                     | 0.294          | 375                                       |
| Chad                   | 3.9%                                                   | 0.042          | 0.7%                                                     | 0.295          | 2,415                                     |
| Tunisia                | 3.9%                                                   | 0.044          | 0.9%                                                     | 0.135          | 4,212                                     |
| Ukraine                | 4.3%                                                   | 0.029          | 0.8%                                                     | 0.223          | 869                                       |

## SUPPLEMENTARY DATA

|              |      |       |      |       |       |
|--------------|------|-------|------|-------|-------|
| Uruguay      | 3.9% | 0.041 | 0.7% | 0.304 | 1,924 |
| Vietnam      | 4.0% | 0.043 | 0.8% | 0.341 | 2,491 |
| South Africa | 4.5% | 0.016 | 0.7% | 0.331 | 1,308 |
| Zambia       | 4.0% | 0.042 | 0.7% | 0.277 | 3,389 |



SUPPLEMENTARY DATA

**Supplementary Table 7.** Sensitivity Analysis: Predicted Difference in Possessing Diabetes Medications, Removing One Country at a Time

| <b>Country Removed</b> | <b>Predicted difference, Insurance versus no insurance</b> | <b>p-value</b> |
|------------------------|------------------------------------------------------------|----------------|
| <i>Full analysis</i>   | 2.2%                                                       | 0.470          |
| Bangladesh             | 2.5%                                                       | 0.407          |
| China                  | 1.9%                                                       | 0.531          |
| Dominican R.           | 2.0%                                                       | 0.514          |
| Ecuador                | 2.4%                                                       | 0.411          |
| Georgia                | 2.2%                                                       | 0.473          |
| Ghana                  | 2.2%                                                       | 0.459          |
| India                  | 3.5%                                                       | 0.292          |
| Kazakhstan             | 2.3%                                                       | 0.421          |
| Kenya                  | 1.8%                                                       | 0.557          |
| Laos                   | 2.2%                                                       | 0.468          |
| Sri Lanka              | 2.4%                                                       | 0.428          |
| Mexico                 | -1.7%                                                      | 0.482          |
| Myanmar                | 2.1%                                                       | 0.494          |
| Malaysia               | 3.2%                                                       | 0.227          |
| Namibia                | 2.2%                                                       | 0.471          |
| Pakistan               | 2.3%                                                       | 0.462          |
| Philippines            | 2.2%                                                       | 0.557          |
| Paraguay               | 2.3%                                                       | 0.454          |
| Russia                 | 0.9%                                                       | 0.747          |
| Tunisia                | 2.4%                                                       | 0.438          |
| Ukraine                | 2.0%                                                       | 0.459          |
| Uruguay                | 2.0%                                                       | 0.501          |
| Vietnam                | 2.4%                                                       | 0.410          |
| South Africa           | 3.0%                                                       | 0.331          |
